# Supplementary material for: Uptake of Vaccinations among Children with Chronic Diseases Is Affected by Knowledge Gaps and Implementation Challenges in Italy
Source: MDPI journal article supplement (doi:10.3390/vaccines9111217), 2021-10-20
Supplement: s1 [file vaccines-1396578-supplementary.pdf › vaccines-1396578-supplementary.pdf]

**Table S1.** List of the chronic or onco-haematological diseases considered in the eligibility criteria.

---

|                                                                                                                                                                    |
|--------------------------------------------------------------------------------------------------------------------------------------------------------------------|
| Chronic heart disease;                                                                                                                                             |
| Conditions at increased risk of aspiration of secretions (e.g. cerebral palsy, neuromuscular diseases, other causes of severe disability);                         |
| Adrenal cortical insufficiency;                                                                                                                                    |
| Severe chronic kidney disease (e.g. nephrotic syndrome*, dialysis ...);                                                                                            |
| Chronic liver disease;                                                                                                                                             |
| Diabetes mellitus;                                                                                                                                                 |
| Haemophilia and other coagulation disorders;                                                                                                                       |
| Anemia and haemoglobinopathy;                                                                                                                                      |
| Severe obesity;                                                                                                                                                    |
| Chronic inflammatory diseases and malabsorption syndromes;                                                                                                         |
| Patients with Cochlear implant;                                                                                                                                    |
| Patients with cerebrospinal fluid fistula;                                                                                                                         |
| Chronic salicylate therapy;                                                                                                                                        |
| Patient waiting for major surgery;                                                                                                                                 |
| Primary or secondary immunodeficiencies (due to immunosuppressive therapies, onchohaematological disease, HIV infection, hematopoietic stem-cell transplantation); |
| Solid organ transplantation;                                                                                                                                       |
| Surgical or functional asplenia.                                                                                                                                   |

---

\* medical condition included only in the immunization schedule of Tuscany region

**Table S2.** Total number of surveys collected by medical condition.

---

| Medical condition                                         | Number of surveys collected |
|-----------------------------------------------------------|-----------------------------|
| Chronic respiratory or lung disease                       | 20 (15.8%)                  |
| Chronic heart disease                                     | 6 (4.7%)                    |
| Conditions at increased risk of aspiration of secretions  | 13 (10.3%)                  |
| Adrenal cortical insufficiency                            | 4 (3.1%)                    |
| Severe chronic kidney disease                             | 4 (3.1%)                    |
| Chronic liver disease                                     | 1 (0.8%)                    |
| Diabetes mellitus                                         | 13 (10.3%)                  |
| Hemophilia and other coagulation disorders                | 4 (3.1%)                    |
| Anemia and hemoglobinopathy                               | 12 (9.5%)                   |
| Severe obesity                                            | 3 (2.4%)                    |
| Chronic inflammatory diseases and malabsorption syndromes | 2 (1.6%)                    |
| Cochlear implant                                          | 6 (4.7%)                    |
| Cerebrospinal fluid fistula                               | 1 (0.8%)                    |
| Chronic salicylate therapy                                | 0 (0.0%)                    |
| Patient waiting for major surgery                         | 2 (1.6%)                    |
| Primary or secondary immunodeficiencies                   | 28 (22.0%)                  |
| Solid organ transplantation                               | 1 (0.8%)                    |
| Surgical or functional asplenia                           | 7 (5.5%)                    |

---
